# Supplementary material for: Non-template hydrothermal route derived mesoporous Ce0.2Zr0.8O2nanosized powders with blue-shifted UV absorption and high CO conversion activity
Source: Royal Society of Chemistry journal article supplement (doi:10.1039/b314885h), 2004-01-01

**Supplementary Information for**

**Non-template hydrothermal route derived mesoporous Ce0.2Zr0.8O2 nanosized powders with blue-shifted UV absorption and high CO conversion activity**

Rui Si,a Ya-Wen Zhang,*a Chao-Xian Xiao,b Shi-Jie Li,b Bing-Xiong Lin,b Yuan Kou,b and Chun-Hua Yan*a

*aState Key Lab of Rare Earth Materials Chemistry and Applications & PKU-HKU Joint Lab on Rare Earth Materials and Bioinorganic Chemistry, Peking University, Beijing 100871, China*

##### ***bCollege of Chemistry and Molecular Engineering, Peking University, Beijing 100871, China***

**Table 1S.** Elementary analysis of N, C, H contents and total weight loss (Δ*m*) of the as-prepared **CZ** samples.

|  | N (wt%) | C (wt%) | H (wt%) | Δ*m* (wt%) |
| --- | --- | --- | --- | --- |
| **CZ14** | 0.49 | 1.31 | 2.13 | 21 |
| **CZ16** | 0.30 | 1.25 | 1.79 | 12 |

**Fig. 1S**FT-IR spectra of the as-prepared **CZ16** powder. **(OH) of water, 3396 cm-1; **(OH) of waterand ethanol, 1634 and 1531 cm-1; **(NO) of uncoordinated NO3, 1365, 1080 and 841 cm-1.


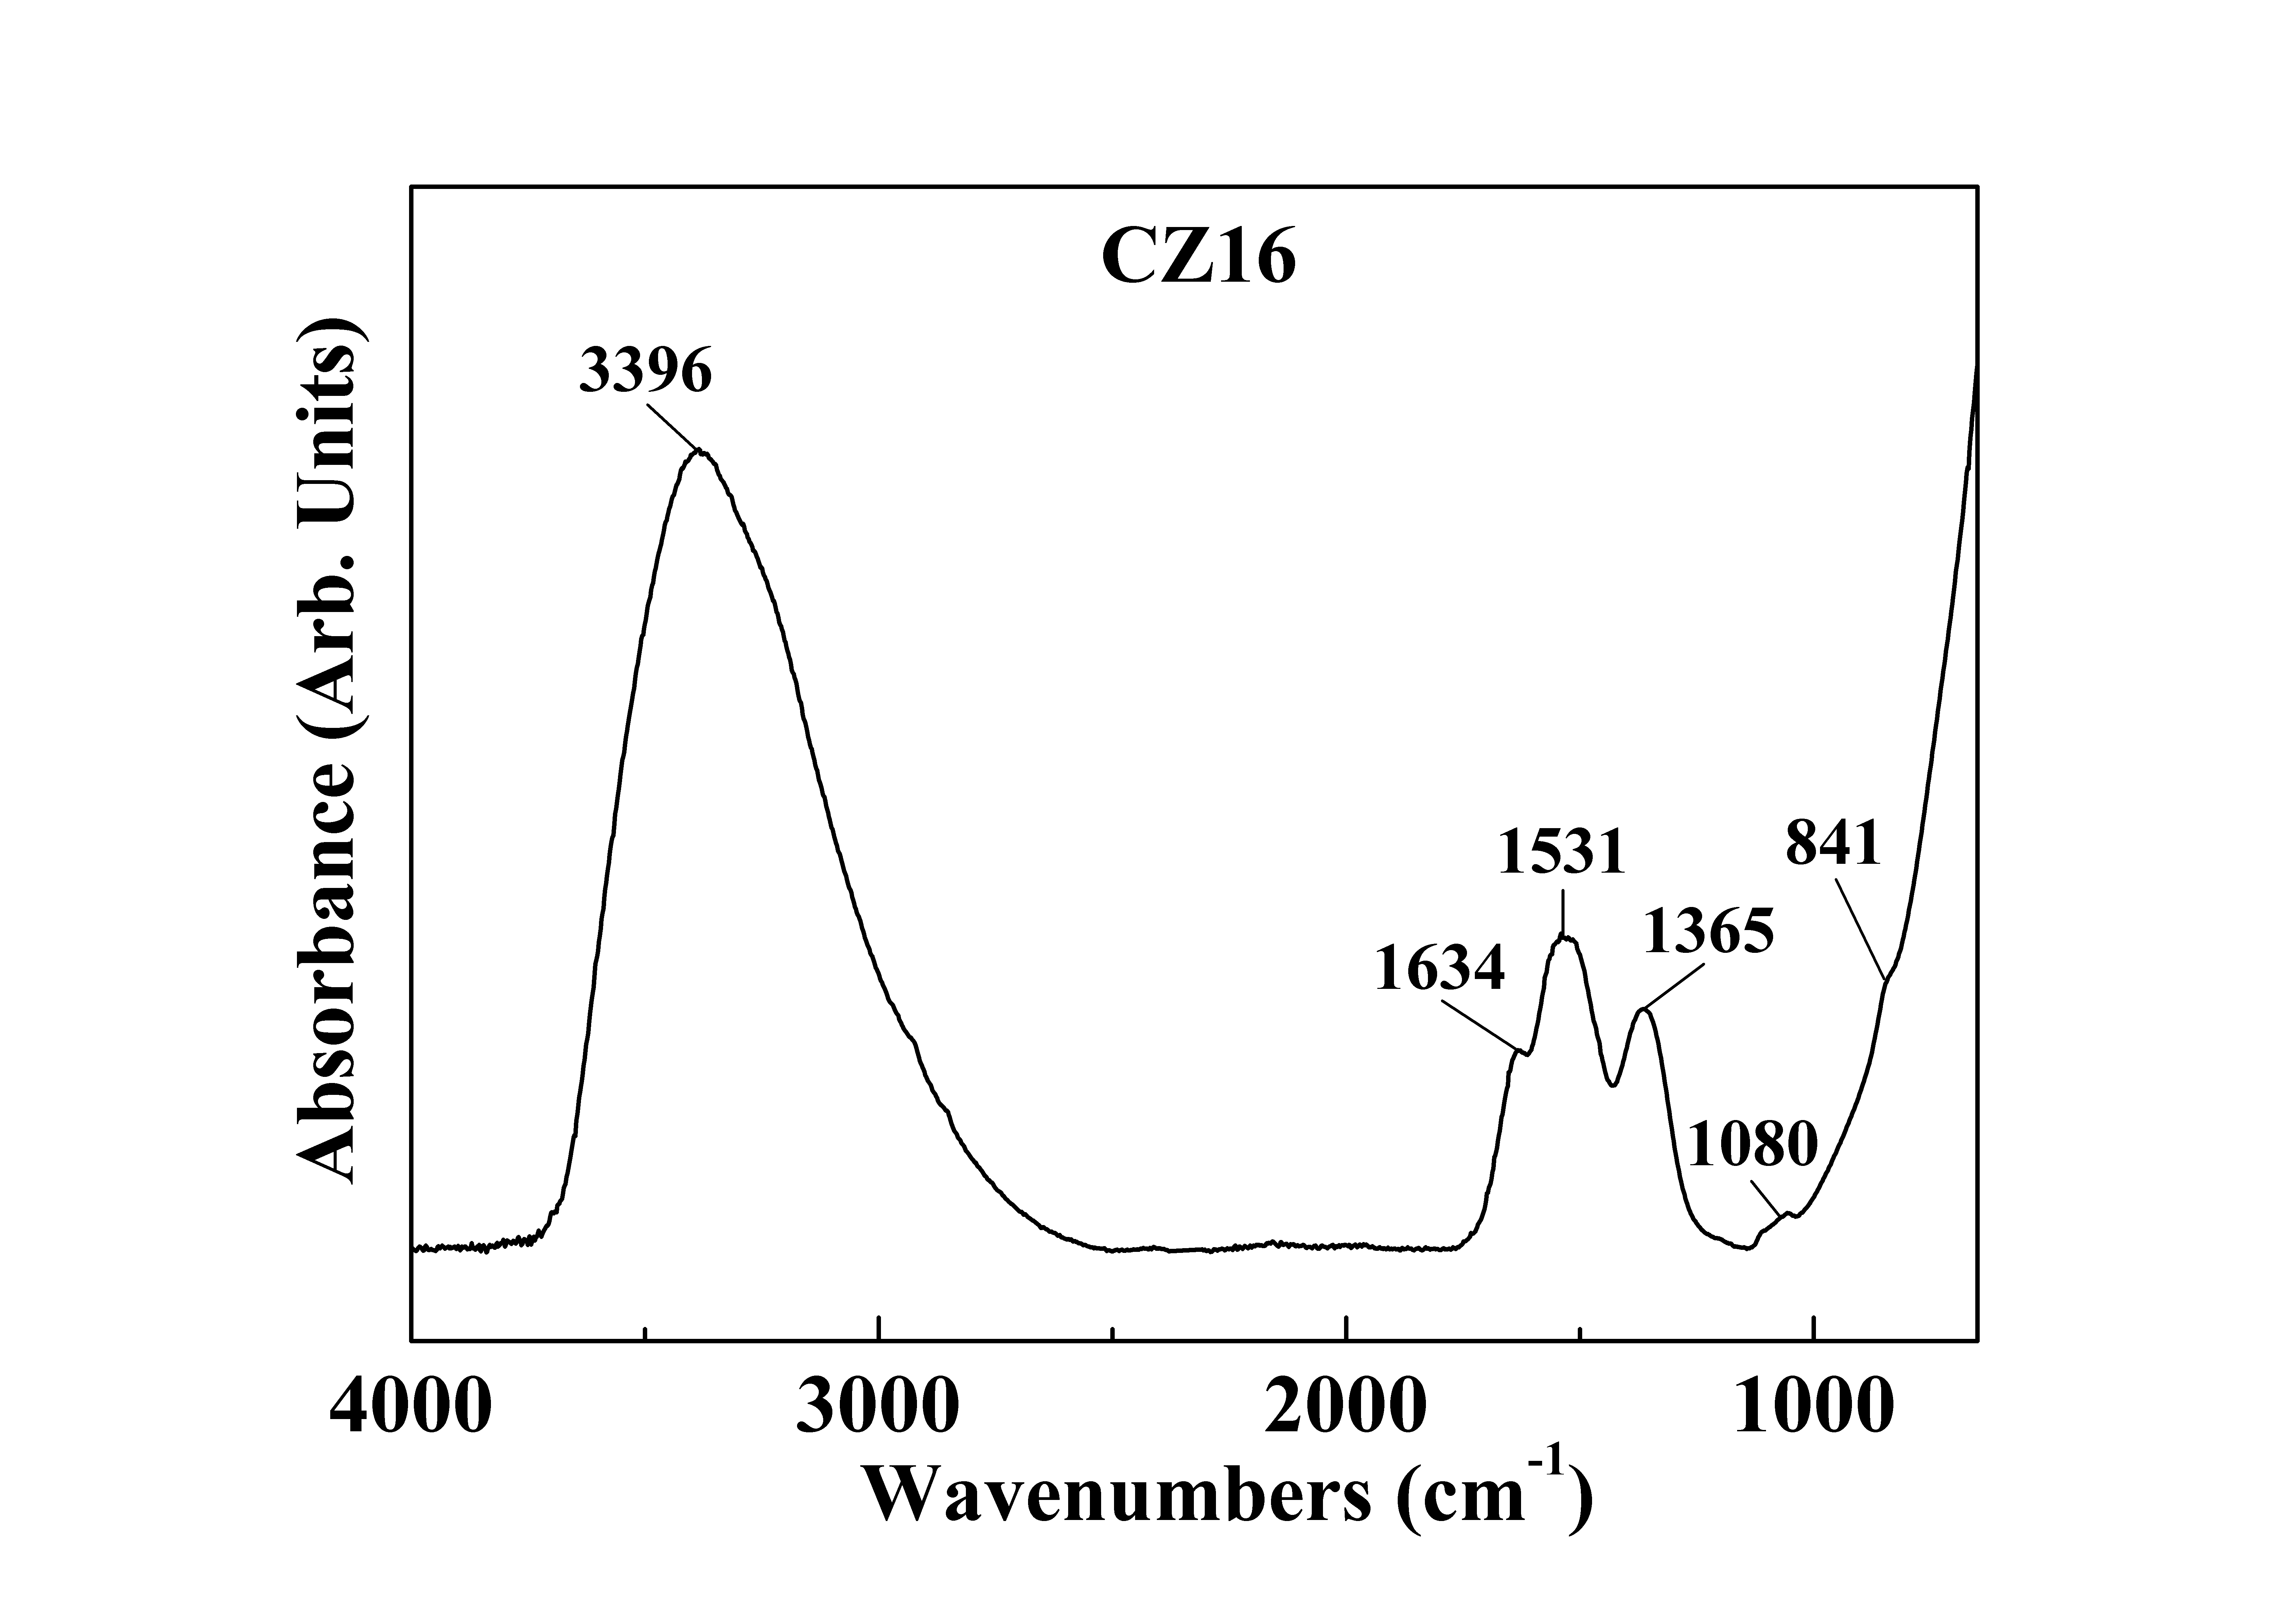


**Fig. 2S**TG-DTA curves of the as-prepared **CZ16** powder.


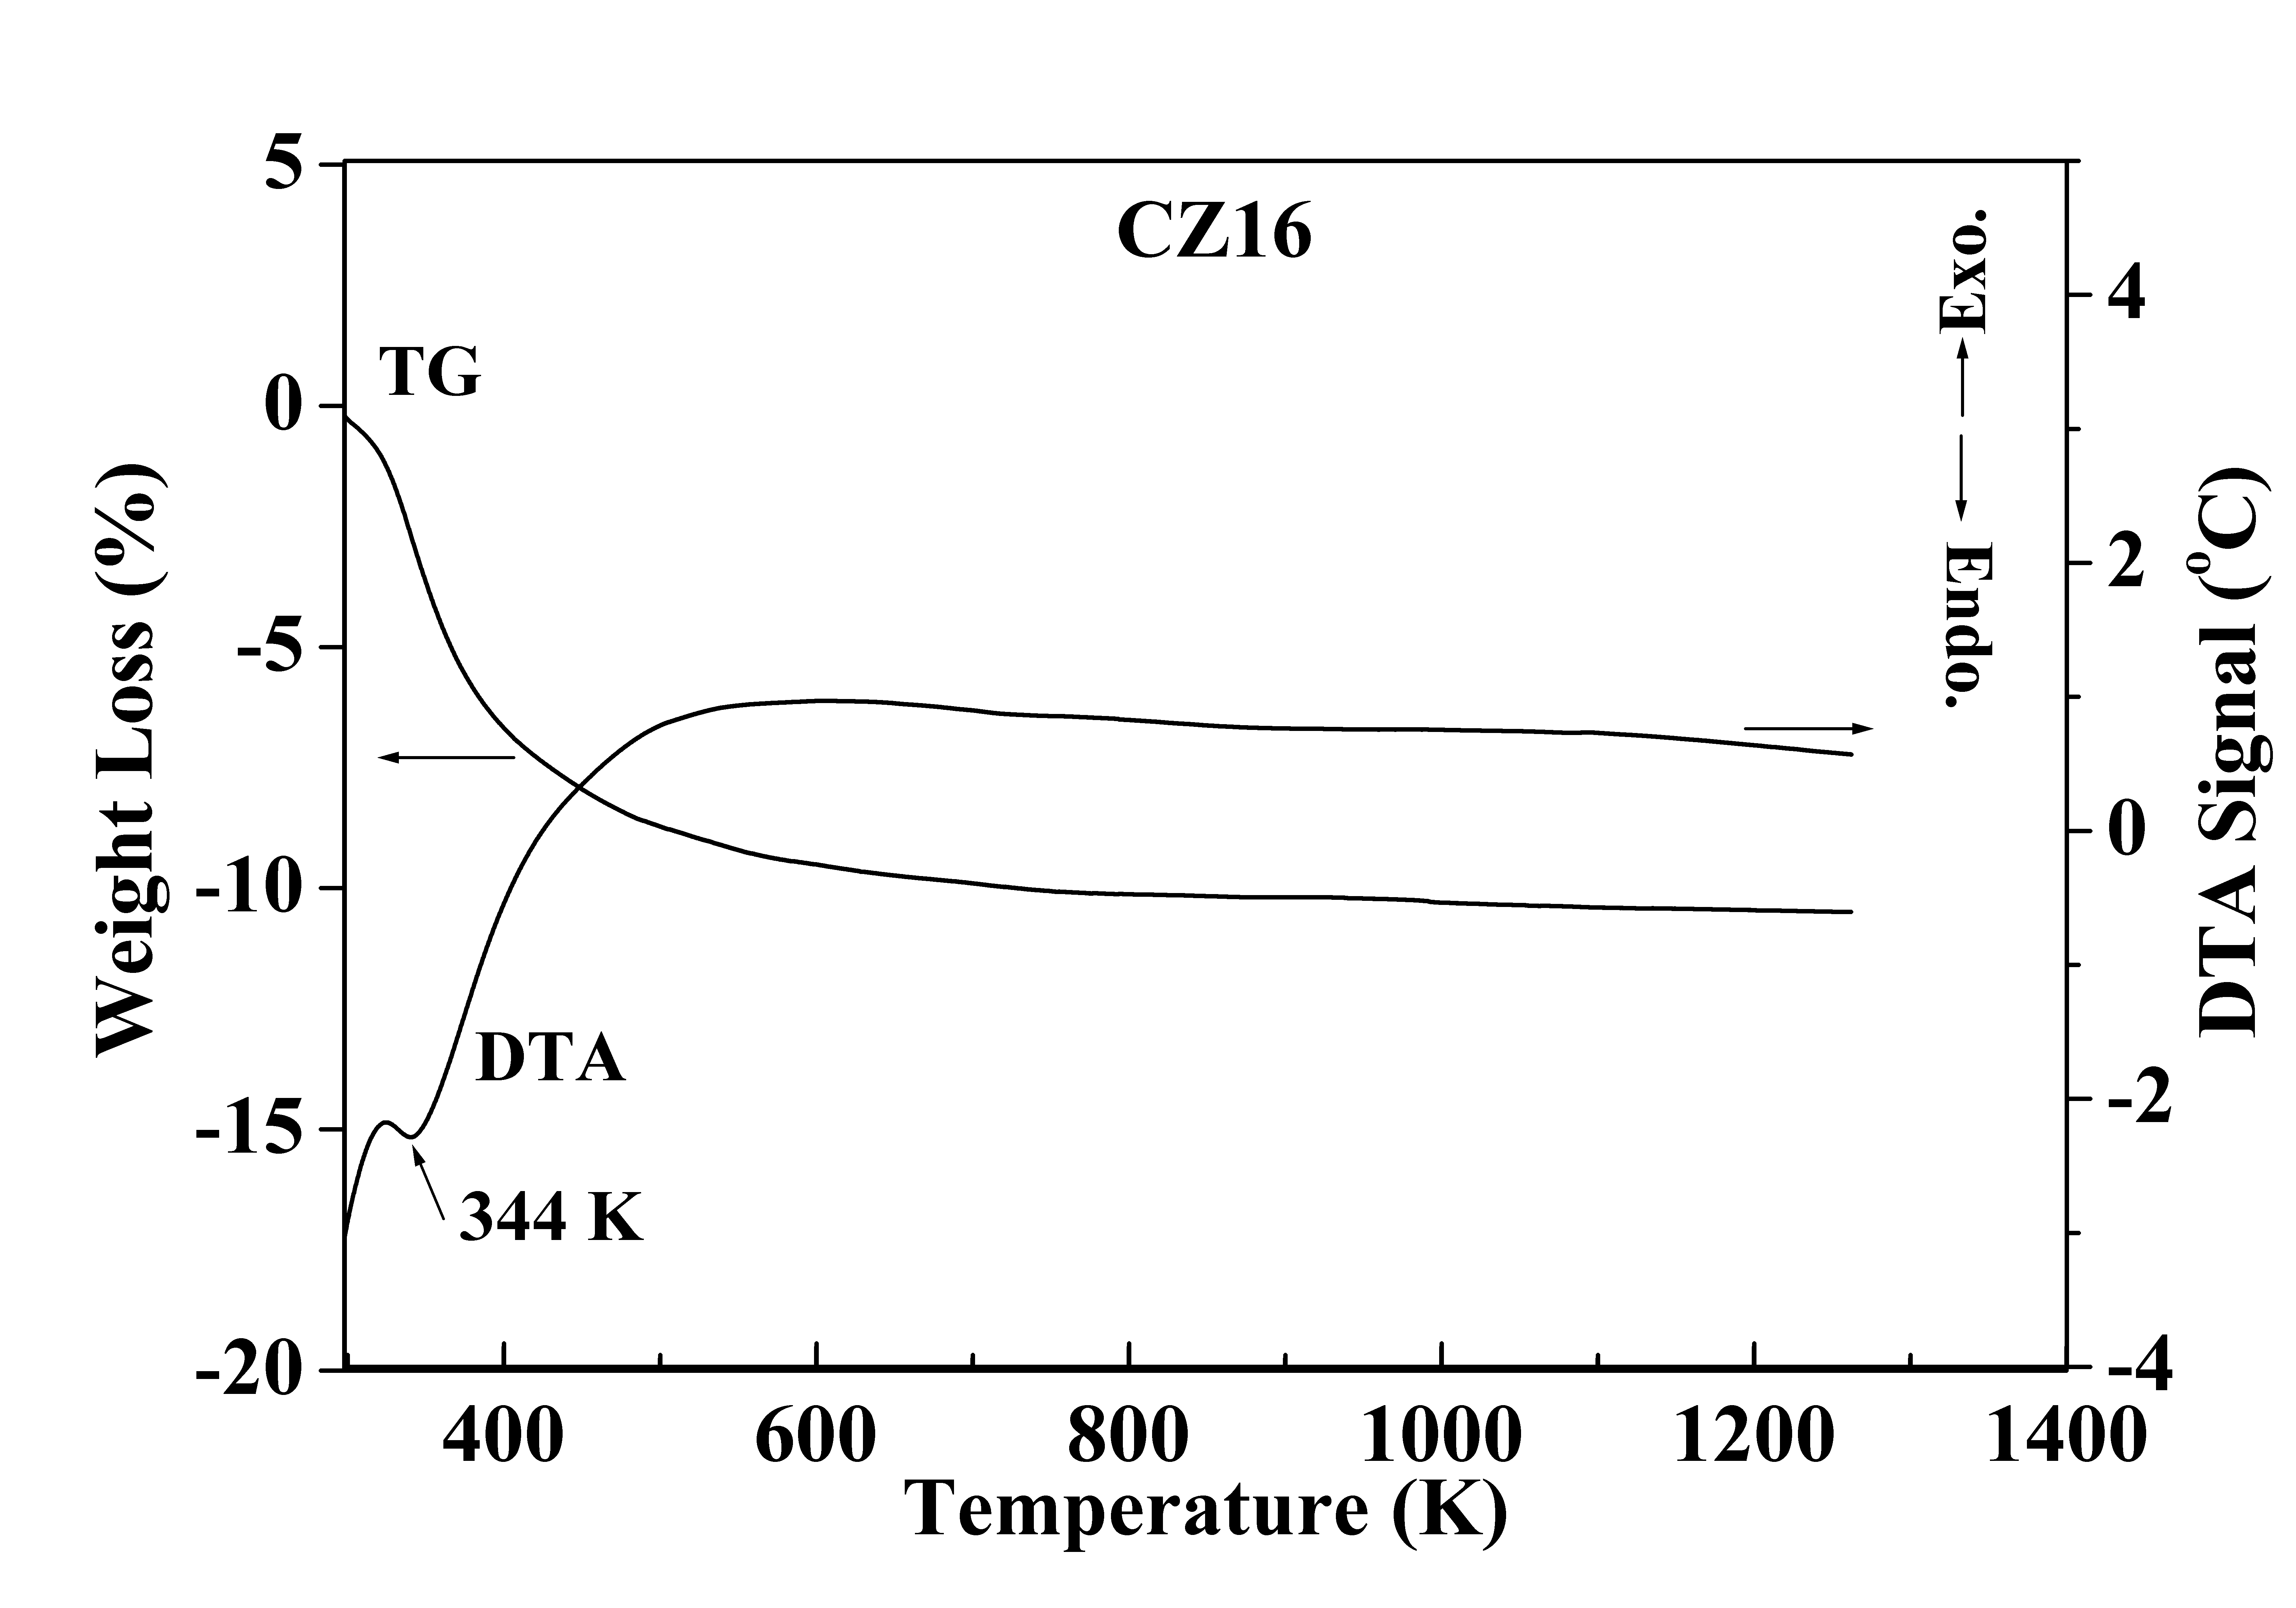

Supplement: b314885h.doc [file b314885h.doc]
